# Supplementary material
Source: PubMed Central journal article supplement (PMC2409258)

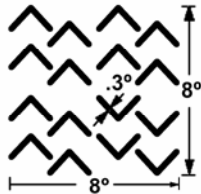

a

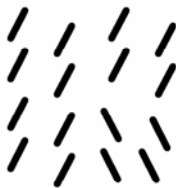

b

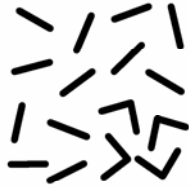

c

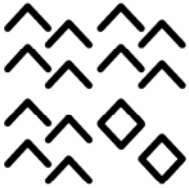

d

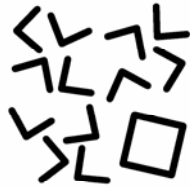

e

Supplement: pnas_0709664104_1.pdf [file pnas_0709664104_1.pdf]
